# Supplementary material
Source: publisher site journal article supplement (https://www.degruyterbrill.com/publication/isbn/9783110253900/downloadAsset/9783110253900_Inhaltsverzeichnis.pdf)
Supplement: Supplementary file 1 [file 9783110253900_Inhaltsverzeichnis.pdf]

# Inhaltsverzeichnis

|                                                                                              |     |
|----------------------------------------------------------------------------------------------|-----|
| Vorwort .....                                                                                | VII |
| Abkürzungsverzeichnis .....                                                                  | XI  |
| Uta Schwarz: Einleitung .....                                                                | 1   |
| 1. Emil Alphons Rheinhardt .....                                                             | 1   |
| 2. Wahlheimat Frankreich: Gast – Gastgeber – unerwünschter Ausländer –<br>Deportierter ..... | 3   |
| 3. Schreiben in der Haft .....                                                               | 10  |
| 4. Auf der Suche nach den Tagebüchern .....                                                  | 16  |
| 5. Manuskript, Typoskript, Kopie: Die Überlieferung der Tagebücher<br>nach 1945 .....        | 19  |
| 6. Der Dokumentenstatus der Tagebuchhandschriften .....                                      | 24  |
| 7. Edition der Tagebücher aus dem Nachlass Dominique Lassaigue .....                         | 26  |
| Tagebuch I: Frankreich 1943/44 .....                                                         | 29  |
| Tagebuch II: Dachau 1944/45 .....                                                            | 183 |
| Fotografien und Dokumente .....                                                              | 241 |
| Archive und Dokumentationsstellen .....                                                      | 273 |
| Bibliographie .....                                                                          | 273 |
| Zeitleiste zur Überlieferung der Tagebücher von Emil Alphons Rheinhardt ....                 | 277 |
| Abbildungsverzeichnis .....                                                                  | 281 |
| Namenregister .....                                                                          | 283 |
